# Supplementary material for: Suspect Screening and Semi-Quantification of Macrolide Antibiotics in Municipal Wastewater by High-Performance Liquid Chromatography—Precursor Ion Scan Tandem Mass Spectrometry
Source: MDPI journal article supplement (doi:10.3390/chemosensors11010044), 2023-01-03

## Supplementary material

# Suspect Screening and Semi-Quantification of Macrolide Antibiotics in Municipal Wastewater by High-Performance Liquid Chromatography – Precursor Ion Scan Tandem Mass Spectrometry

### Contents:

**Figure S1.** Collision-induced dissociation pathways of erythromycin.

**Figure S2.** Collision-induced dissociation pathways of clarithromycin.

**Figure S3.** Collision-induced dissociation pathways of azithromycin.

**Figure S4.** Collision-induced dissociation pathways of midecamycin.

**Figure S5.** Collision-induced dissociation pathways of spiramycin.

**Figure S6.** Collision-induced dissociation pathways of josamycin.

**Figure S7.** HPLC-MS/MS (PrecIS) chromatogram of the model mixture macrolides with concentrations close to LOQ.

Diagnostic ions:  $m/z$  174 (red) and  $m/z$  158 (black)

**Figure S8.** Extracted ion current HPLC-HRMS chromatograms of municipal wastewater (peak numbers and  $m/z$  values correspond to those listed in Figure 4 and in Table 4).

**Table S1.** Recoveries of the macrolides obtained by solid-phase extraction on an HLB stationary phase.

**Table S2.** Tandem mass spectra of the precursor ion candidates found in HPLC-MS/MS (PrecIS) chromatogram of municipal wastewater (compound numbers correspond to the peaks on Figure 4 and in Table 4).

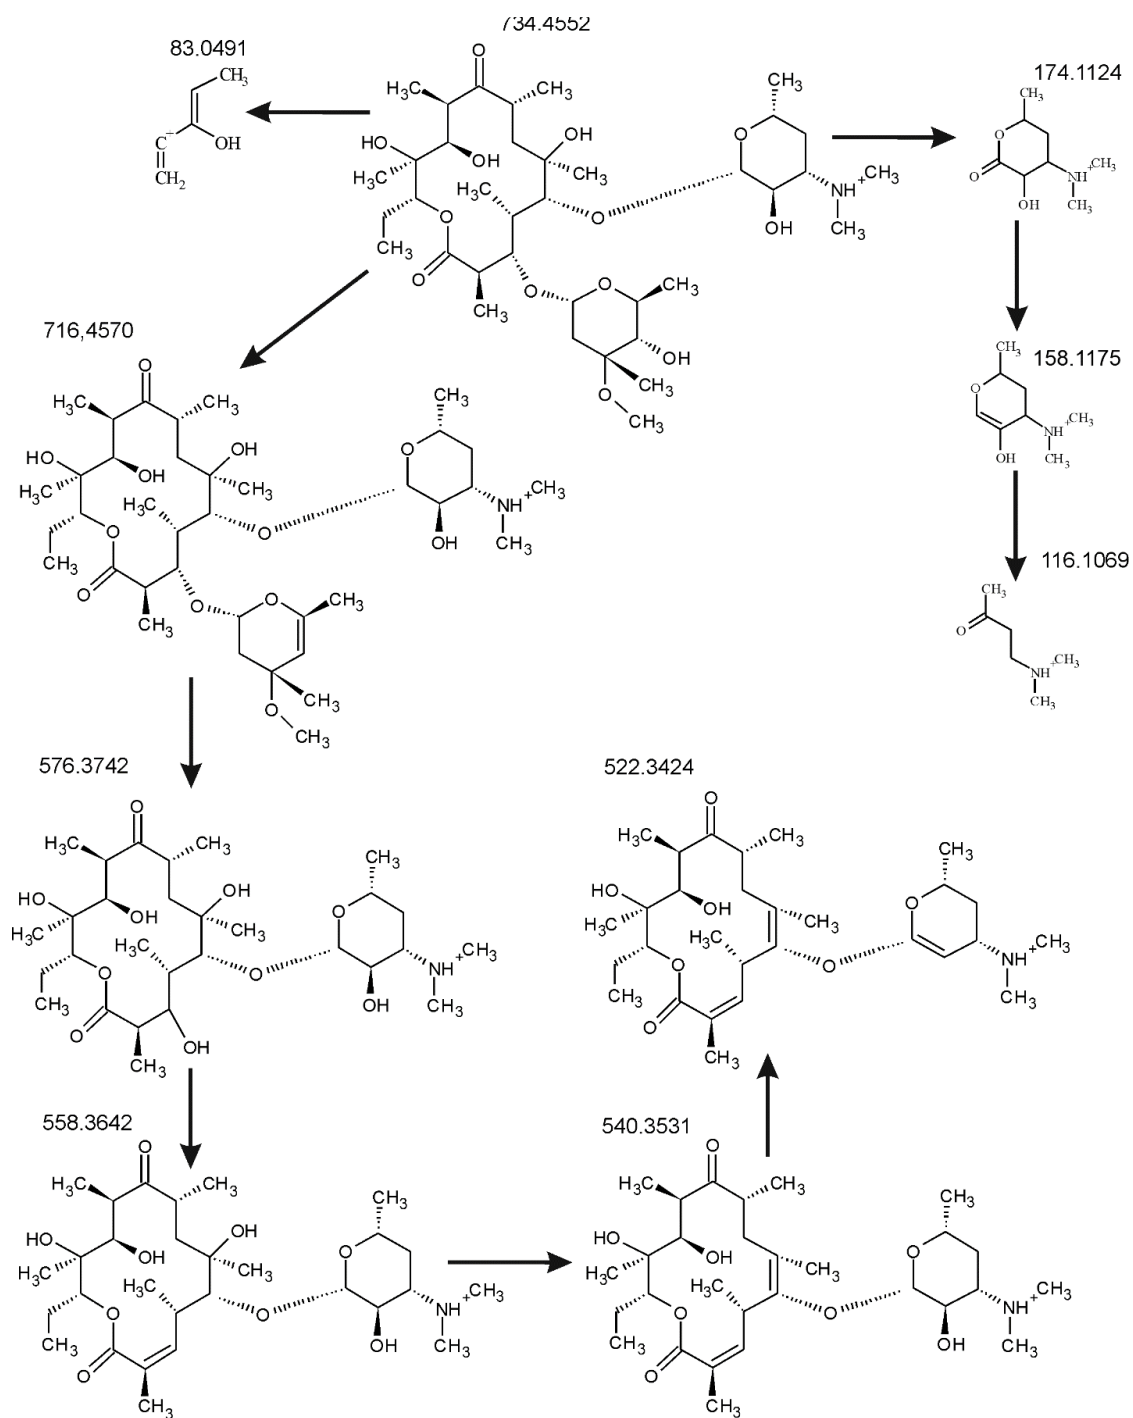

**Figure S1.** Collision-induced dissociation pathways of erythromycin.

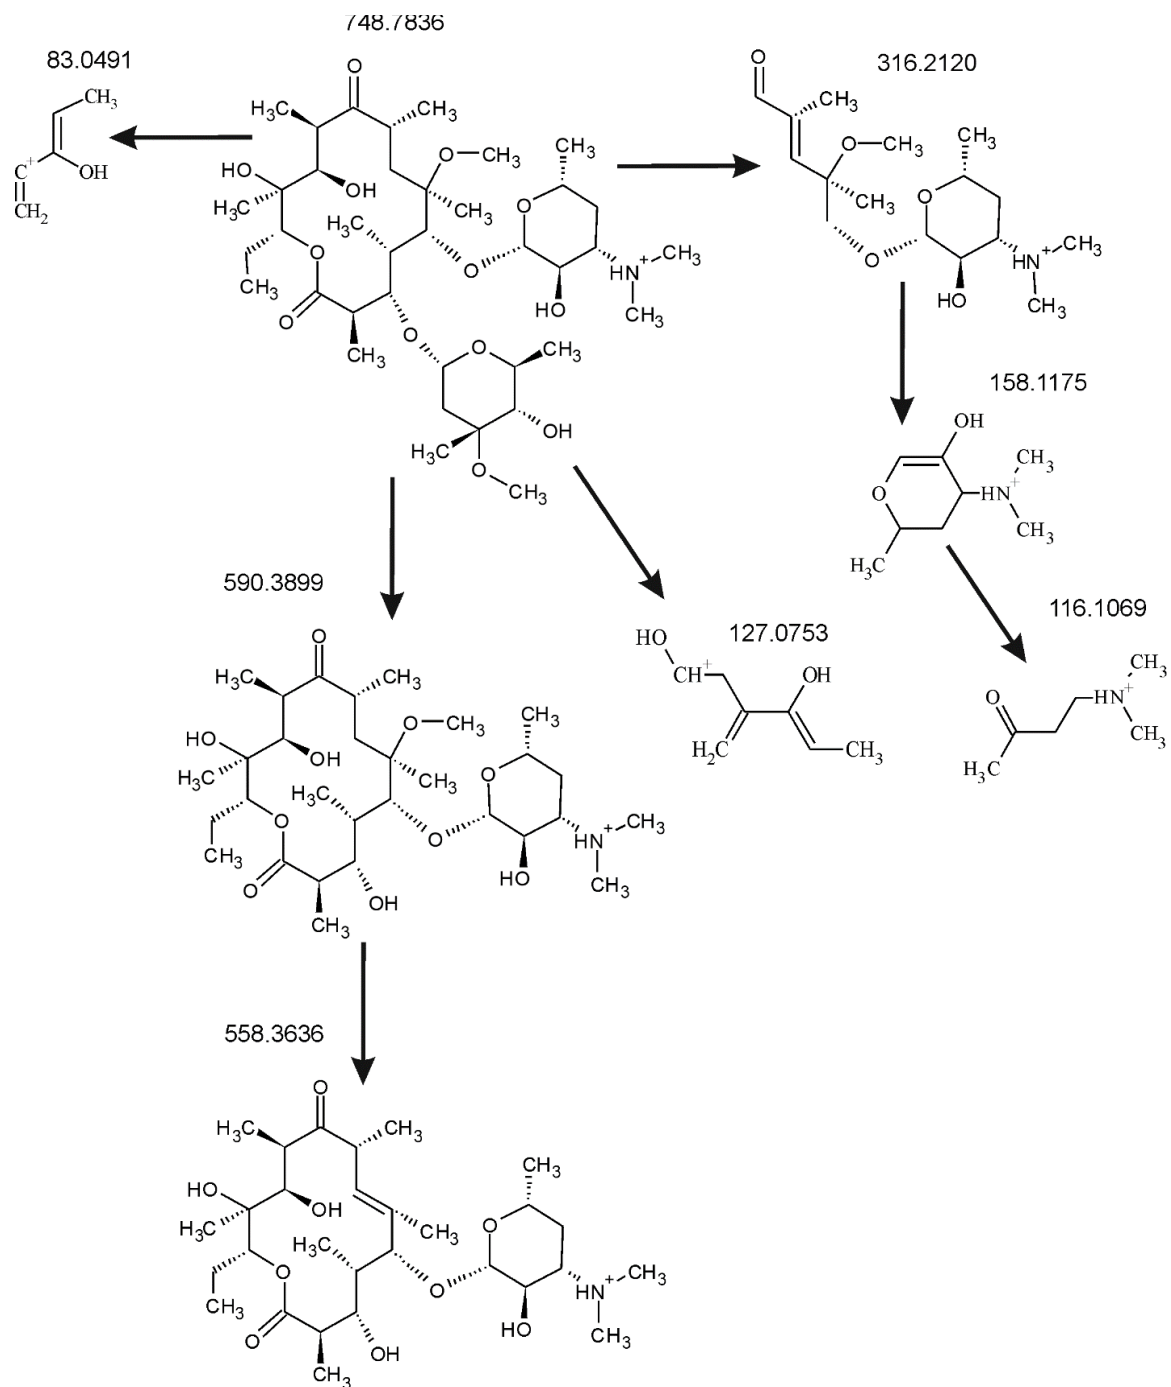

**Figure S2.** Collision-induced dissociation pathways of clarithromycin.

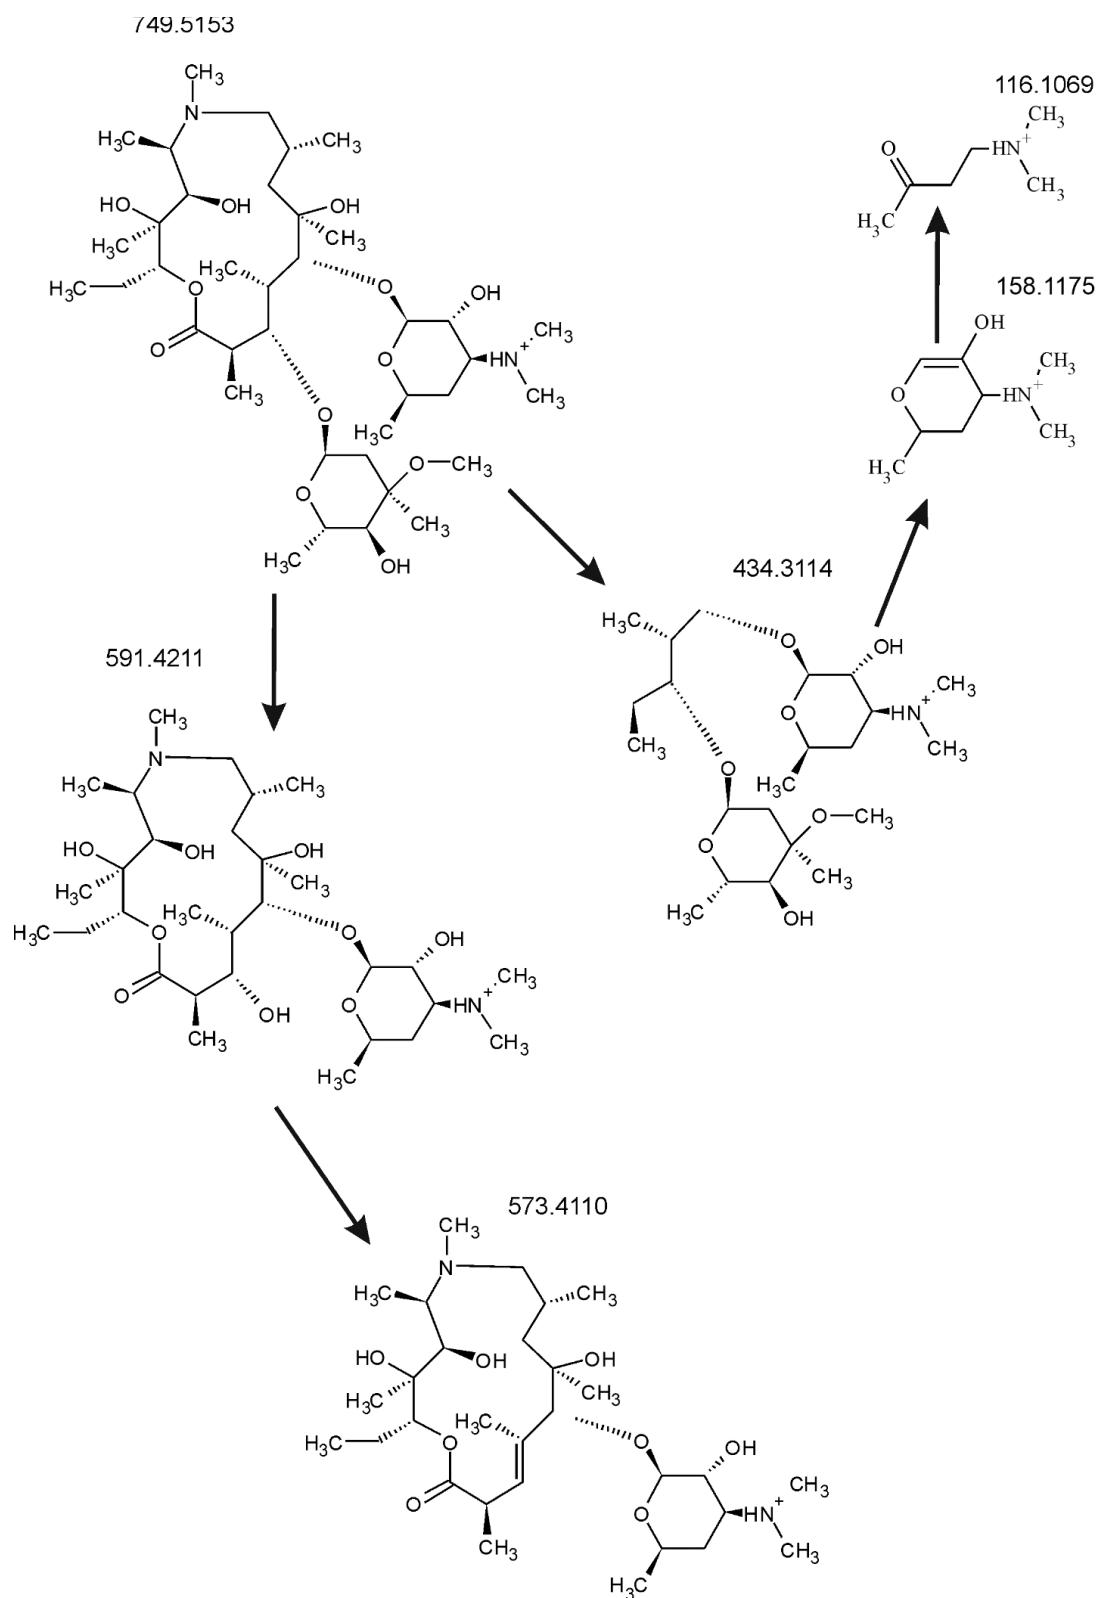

**Figure S3.** Collision-induced dissociation pathways of azithromycin.

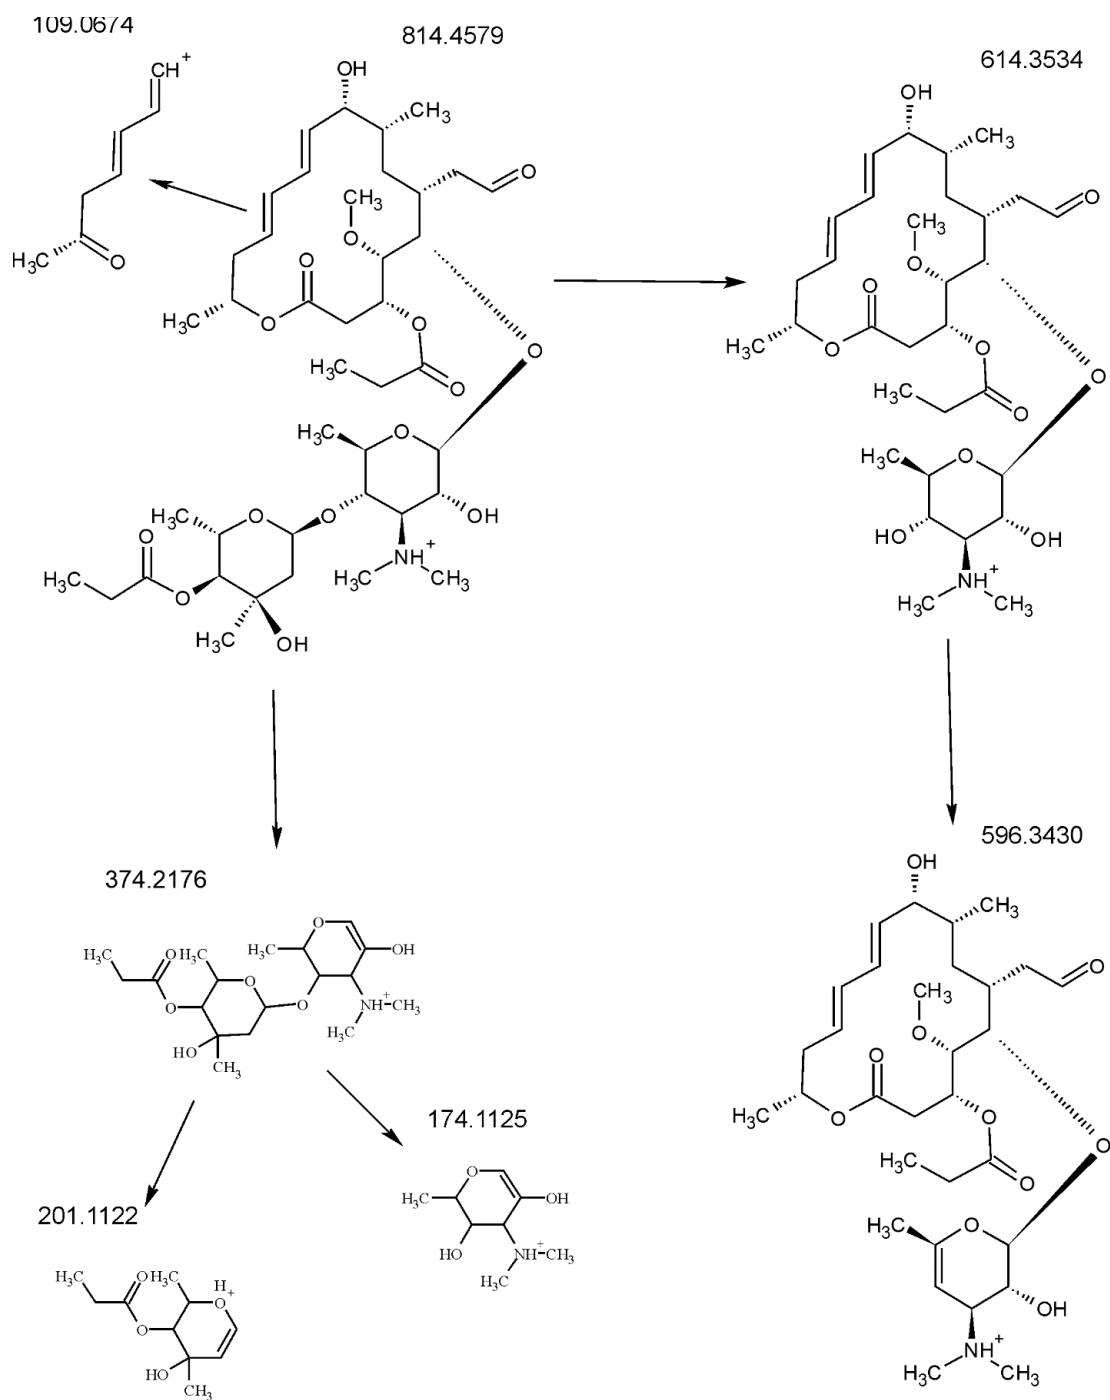

**Figure S4.** Collision-induced dissociation pathways of midecamycin.

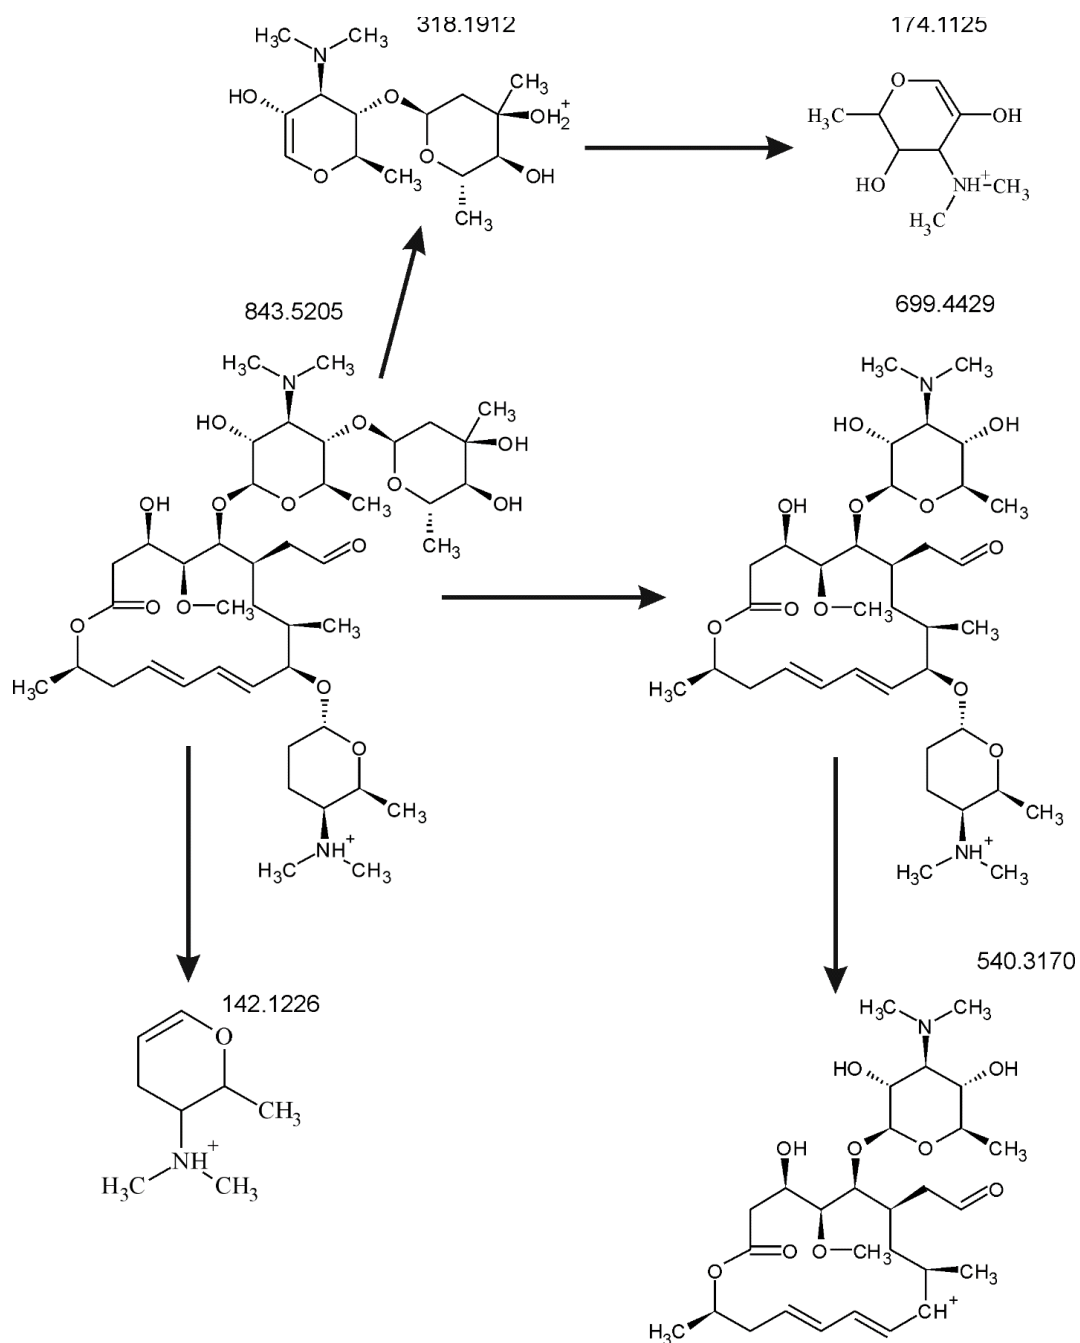

**Figure S5.** Collision-induced dissociation pathways of spiramycin.

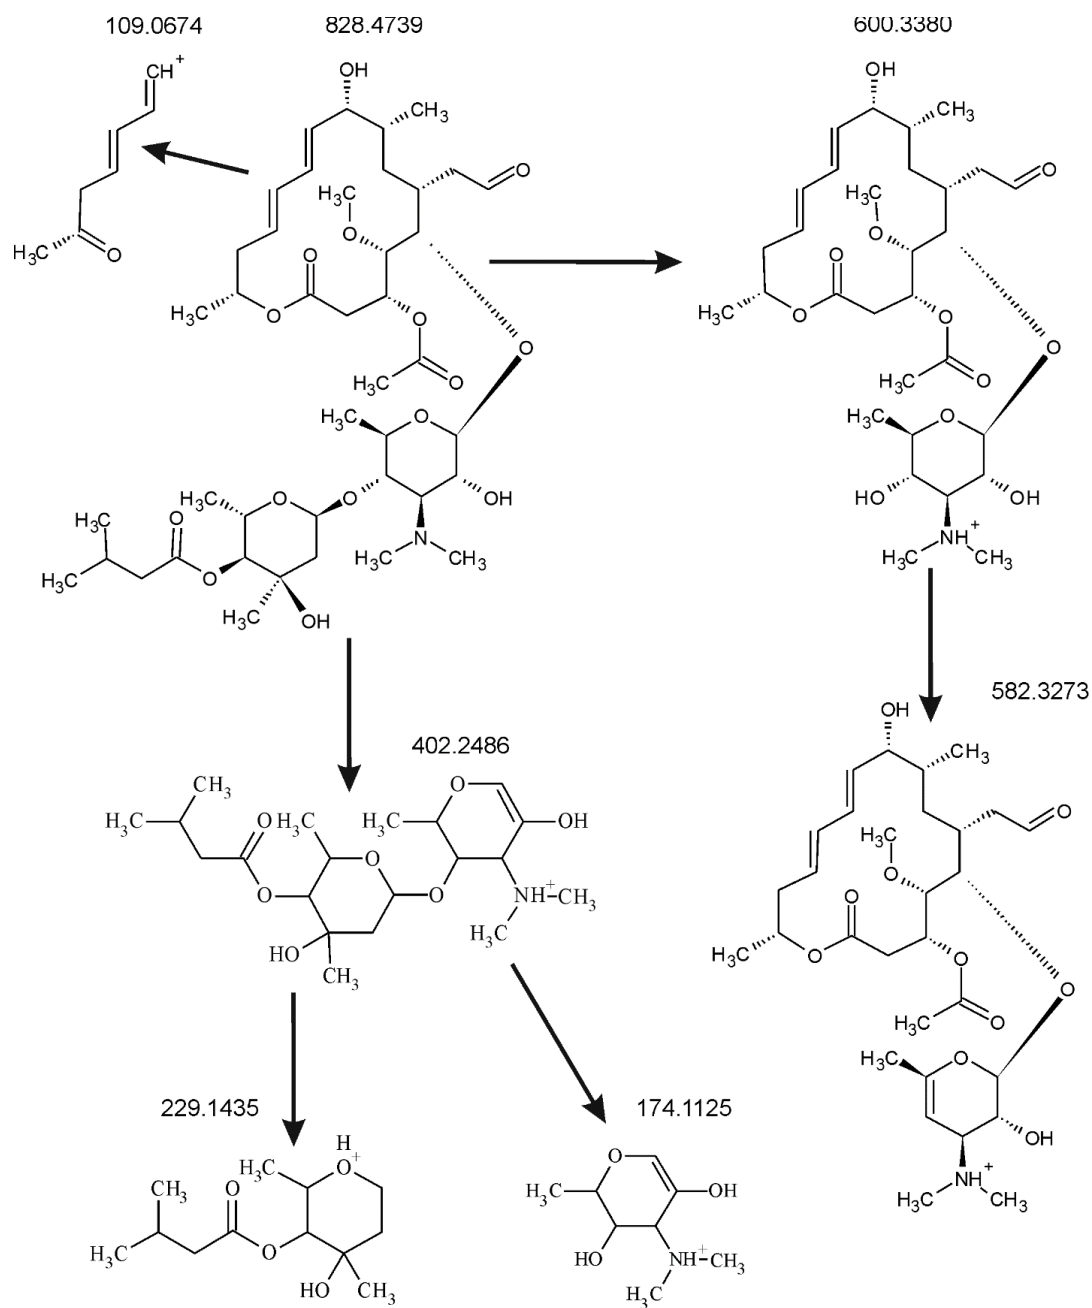

**Figure S6.** Collision-induced dissociation pathways of josamycin.

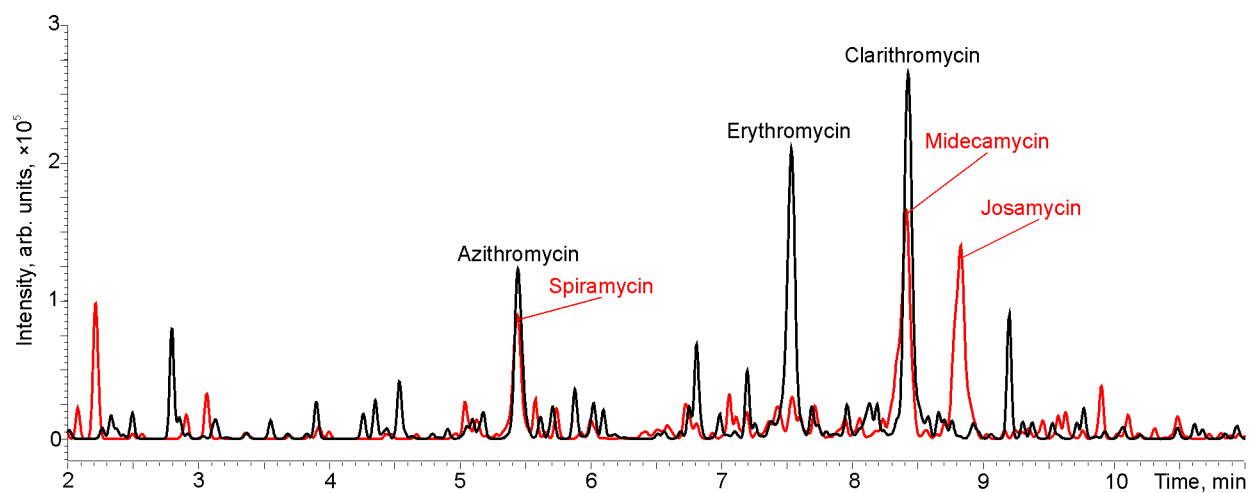

**Figure S7.** HPLC-MS/MS (PrecIS) chromatogram of the model mixture macrolides with concentrations close to LOQ.

Diagnostic ions:  $m/z$  174 (red) and  $m/z$  158 (black)



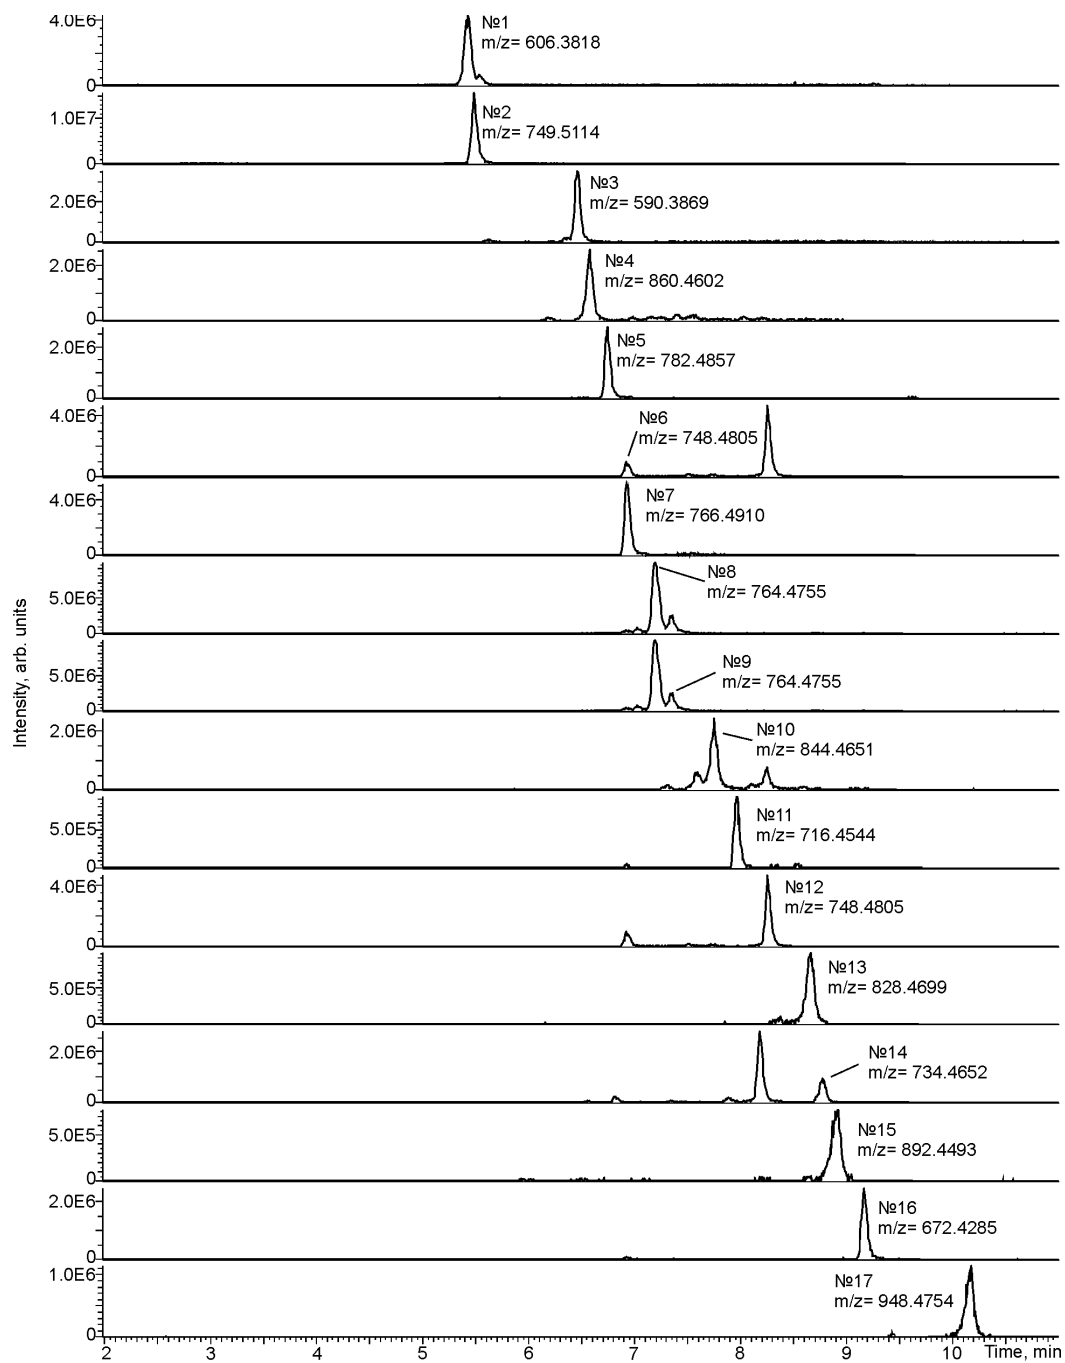

**Figure S8.** Extracted ion current HPLC-HRMS chromatograms of municipal wastewater (peak numbers and  $m/z$  values correspond to those listed in Figure 4 and in Table 4).

**Table S1.** Recoveries of the macrolides obtained by solid-phase extraction on an HLB stationary phase.

| Compound       | Recovery, % |
|----------------|-------------|
| Azithromycin   | 53.4±5.8    |
| Spiramycin     | 58.9±2.8    |
| Erythromycin   | 73.1±0.7    |
| Midecamycin    | 82.1±0.2    |
| Clarithromycin | 93.8±2      |
| Josamycin      | 84.7±1.2    |

**Table S2.** Tandem mass spectra of the precursor ion candidates found in HPLC-MS/MS (PrecIS) chromatogram of municipal wastewater (compound numbers correspond to the peaks on Figure 4 and in Table 4).

| № | Precursor ion, $m/z$ | Collision energy                                                                    |                                                                                      |
|---|----------------------|-------------------------------------------------------------------------------------|--------------------------------------------------------------------------------------|
|   |                      | 20 eV                                                                               | 32 or 36 eV                                                                          |
| 1 | 606                  | 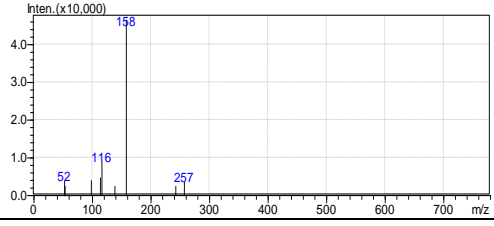   |    |
| 2 | 749                  |    |    |
| 3 | 590                  |   |   |
| 4 | 860                  |  |  |
| 5 | 782                  |  |  |
| 6 | 748                  |  |  |
| 7 | 766                  |  |  |

|    |     |                                                                                                                                                                                                                                                       |                                                                                                                                                                                                                                          |
|----|-----|-------------------------------------------------------------------------------------------------------------------------------------------------------------------------------------------------------------------------------------------------------|------------------------------------------------------------------------------------------------------------------------------------------------------------------------------------------------------------------------------------------|
| 8  | 764 | <p>Mass spectrum for compound 8, m/z 764. The x-axis is m/z from 0 to 750, and the y-axis is Intensity (x10,000) from 0.0 to 7.5. The base peak is at m/z 606. Other significant peaks are at m/z 158, 116, 316, 362, 538, 574, and 764.</p>          | <p>Mass spectrum for compound 8, m/z 764. The x-axis is m/z from 0 to 750, and the y-axis is Intensity (x100,000) from 0.0 to 1.5. The base peak is at m/z 158. Other significant peaks are at m/z 116 and 363.</p>                      |
| 9  | 764 | <p>Mass spectrum for compound 9, m/z 764. The x-axis is m/z from 0 to 750, and the y-axis is Intensity (x10,000) from 0.0 to 2.5. The base peak is at m/z 138. Other significant peaks are at m/z 116, 556, 640, and 764.</p>                         | <p>Mass spectrum for compound 9, m/z 764. The x-axis is m/z from 0 to 750, and the y-axis is Intensity (x10,000) from 0.0 to 2.5. The base peak is at m/z 137. Other significant peaks are at m/z 115, 195, 208, 556, 574, and 604.</p>  |
| 10 | 844 | <p>Mass spectrum for compound 10, m/z 844. The x-axis is m/z from 0 to 750, and the y-axis is Intensity (x10,000) from 0.0 to 1.5. The base peak is at m/z 417. Other significant peaks are at m/z 174, 109, 229, 362, 616, and 844.</p>              | <p>Mass spectrum for compound 10, m/z 844. The x-axis is m/z from 0 to 750, and the y-axis is Intensity (x10,000) from 0.0 to 2.0. The base peak is at m/z 174. Other significant peaks are at m/z 116, 229, 367, 462, 681, and 674.</p> |
| 11 | 716 | <p>Mass spectrum for compound 11, m/z 716. The x-axis is m/z from 0 to 750, and the y-axis is Intensity (x10,000) from 0.0 to 2.0. The base peak is at m/z 717. Other significant peaks are at m/z 158, 174, 103, 345, 558, and 716.</p>              | <p>Mass spectrum for compound 11, m/z 716. The x-axis is m/z from 0 to 750, and the y-axis is Intensity (x10,000) from 0.0 to 1.25. The base peak is at m/z 716. Other significant peaks are at m/z 188, 144, 83, 360, 558, and 716.</p> |
| 12 | 748 | <p>Mass spectrum for compound 12, m/z 748. The x-axis is m/z from 0 to 750, and the y-axis is Intensity (x10,000) from 0.0 to 2.0. The base peak is at m/z 590. Other significant peaks are at m/z 158, 117, 365, 483, 558, and 748.</p>              | <p>Mass spectrum for compound 12, m/z 748. The x-axis is m/z from 0 to 750, and the y-axis is Intensity (x10,000) from 0.0 to 4.0. The base peak is at m/z 138. Other significant peaks are at m/z 83, 315, 437, 558, 670, and 748.</p>  |
| 13 | 828 | <p>Mass spectrum for compound 13, m/z 828. The x-axis is m/z from 0 to 750, and the y-axis is Intensity (x10,000) from 0.0 to 3.0. The base peak is at m/z 828. Other significant peaks are at m/z 174 and 598.</p>                                   | <p>Mass spectrum for compound 13, m/z 828. The x-axis is m/z from 0 to 750, and the y-axis is Intensity (x10,000) from 0.0 to 3.0. The base peak is at m/z 174. Other significant peaks are at m/z 83, 108, 229, 259, and 828.</p>       |
| 14 | 734 | <p>Mass spectrum for compound 14, m/z 734. The x-axis is m/z from 0 to 750, and the y-axis is Intensity (x10,000) from 0.0 to 1.5. The base peak is at m/z 138. Other significant peaks are at m/z 60, 89, 198, 208, 428, 481, 576, 692, and 734.</p> | <p>Mass spectrum for compound 14, m/z 734. The x-axis is m/z from 0 to 750, and the y-axis is Intensity (x10,000) from 0.0 to 2.5. The base peak is at m/z 138. Other significant peaks are at m/z 116, 304, 576, and 734.</p>           |
| 15 | 892 | <p>Mass spectrum for compound 15, m/z 892. The x-axis is m/z from 0 to 750, and the y-axis is Intensity (x10,000) from 0.0 to 3.0. The base peak is at m/z 892. Other significant peaks are at m/z 174, 109, and 229.</p>                             | <p>Mass spectrum for compound 15, m/z 892. The x-axis is m/z from 0 to 750, and the y-axis is Intensity (x10,000) from 0.0 to 4.0. The base peak is at m/z 174. Other significant peaks are at m/z 109, 229, 381, and 663.</p>           |

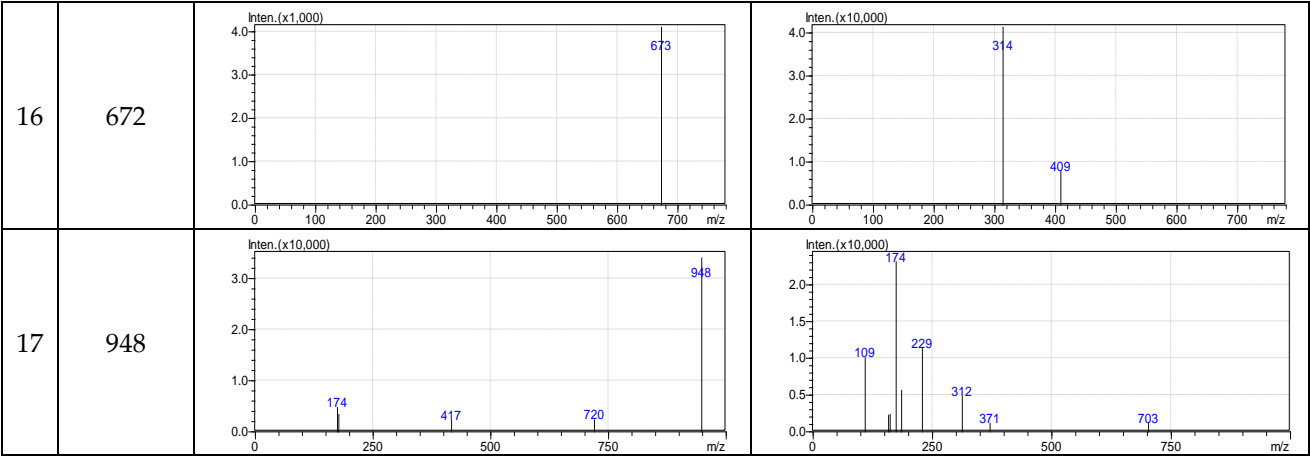

Supplement: s1 [file s1]
